# Supplementary material for: Preliminary results of the European multicentric phase III trial regarding sirolimus in slow-flow vascular malformations
Source: JCI journal article supplement (doi:10.1172/jci.insight.173095), 2023-11-07
Supplement: sd1 [file 1]

You are being redirected.
